# Supplementary material for: Crystal Structure and Density Functional Theory Study on Structural Properties and Energies of a Isonicotinohydrazide Compound
Source: Molecules. 2011 Sep 8;16(9):7715–24. doi: 10.3390/molecules16097715 (PMC6264359; doi:10.3390/molecules16097715)
Supplement: Supplementary File 1 [file molecules-16-07715-s001.pdf]

## Supplementary Materials

**Table S1.** XYZ coordinates for compound (1) by using DFT/B3LYP/6–311G\*\*.

| Center<br>Number | Number<br>Atomic | Type<br>Atomic | Coordinates (Angstroms) |           |           |
|------------------|------------------|----------------|-------------------------|-----------|-----------|
|                  |                  |                | X                       | Y         | Z         |
| 1                | 6                | 0              | −3.008572               | 0.761847  | 0.599093  |
| 2                | 6                | 0              | −1.712612               | 0.262390  | 0.606260  |
| 3                | 6                | 0              | −1.411727               | −1.024142 | 0.108721  |
| 4                | 6                | 0              | −2.494770               | −1.796217 | −0.361191 |
| 5                | 6                | 0              | −3.792700               | −1.307995 | −0.385689 |
| 6                | 6                | 0              | −4.088147               | −0.001326 | 0.084215  |
| 7                | 1                | 0              | −3.182527               | 1.746189  | 1.005316  |
| 8                | 1                | 0              | −0.938247               | 0.869115  | 1.056349  |
| 9                | 1                | 0              | −2.307858               | −2.800681 | −0.722219 |
| 10               | 1                | 0              | −4.579127               | −1.941639 | −0.765586 |
| 11               | 7                | 0              | −5.377046               | 0.502187  | 0.054148  |
| 12               | 6                | 0              | −6.476562               | −0.313768 | −0.464417 |
| 13               | 1                | 0              | −7.396857               | 0.262481  | −0.422723 |
| 14               | 1                | 0              | −6.306954               | −0.603507 | −1.505979 |
| 15               | 1                | 0              | −6.620748               | −1.224567 | 0.125822  |
| 16               | 6                | 0              | −5.656015               | 1.848315  | 0.558785  |
| 17               | 1                | 0              | −6.712225               | 2.065579  | 0.425083  |
| 18               | 1                | 0              | −5.424060               | 1.939762  | 1.624880  |
| 19               | 1                | 0              | −5.084125               | 2.607600  | 0.017005  |
| 20               | 6                | 0              | −0.075639               | −1.629571 | 0.118765  |
| 21               | 1                | 0              | −0.038047               | −2.706064 | 0.246074  |
| 22               | 7                | 0              | 1.106509                | −1.104472 | −0.031557 |
| 23               | 7                | 0              | 1.216264                | 0.248856  | −0.309939 |
| 24               | 1                | 0              | 0.393167                | 0.781921  | −0.575129 |
| 25               | 6                | 0              | 2.390981                | 0.961486  | −0.431508 |
| 26               | 8                | 0              | 2.284157                | 2.163074  | −0.787556 |
| 27               | 6                | 0              | 3.739409                | 0.379836  | −0.133426 |
| 28               | 6                | 0              | 4.817108                | 1.281729  | −0.175046 |
| 29               | 6                | 0              | 4.021688                | −0.962042 | 0.166750  |
| 30               | 6                | 0              | 6.104833                | 0.822950  | 0.082978  |
| 31               | 1                | 0              | 4.627637                | 2.318260  | −0.409934 |
| 32               | 6                | 0              | 5.346457                | −1.334044 | 0.407703  |
| 33               | 1                | 0              | 3.229807                | −1.688980 | 0.209630  |
| 34               | 7                | 0              | 6.382717                | −0.469723 | 0.373134  |
| 35               | 1                | 0              | 6.950423                | 1.495957  | 0.060406  |
| 36               | 1                | 0              | 5.594979                | −2.360649 | 0.638977  |

**Table S2.** XYZ coordinates for compound (1) by using DFT/PBE1PBE/6–311G\*\*.

| Center<br>Number | Number<br>Atomic | Type<br>Atomic | Coordinates (Angstroms) |           |           |
|------------------|------------------|----------------|-------------------------|-----------|-----------|
|                  |                  |                | X                       | Y         | Z         |
| 1                | 6                | 0              | −2.948640               | 0.674252  | 0.703032  |
| 2                | 6                | 0              | −1.669473               | 0.142248  | 0.696670  |
| 3                | 6                | 0              | −1.386235               | −1.092111 | 0.077144  |
| 4                | 6                | 0              | −2.465537               | −1.782325 | −0.501695 |
| 5                | 6                | 0              | −3.746183               | −1.256580 | −0.513297 |
| 6                | 6                | 0              | −4.022611               | −0.002354 | 0.080070  |
| 7                | 1                | 0              | −3.115500               | 1.617259  | 1.204772  |
| 8                | 1                | 0              | −0.886859               | 0.675100  | 1.224241  |
| 9                | 1                | 0              | −2.291159               | −2.748670 | −0.960924 |
| 10               | 1                | 0              | −4.537889               | −1.824115 | −0.982016 |
| 11               | 7                | 0              | −5.285961               | 0.531029  | 0.063079  |
| 12               | 6                | 0              | −6.370077               | −0.187764 | −0.578433 |
| 13               | 1                | 0              | −7.281877               | 0.401400  | −0.508349 |
| 14               | 1                | 0              | −6.168401               | −0.365627 | −1.640814 |
| 15               | 1                | 0              | −6.559807               | −1.155957 | −0.100826 |
| 16               | 6                | 0              | −5.542922               | 1.812392  | 0.692552  |
| 17               | 1                | 0              | −6.590398               | 2.073973  | 0.558835  |
| 18               | 1                | 0              | −5.338822               | 1.788135  | 1.769291  |
| 19               | 1                | 0              | −4.939256               | 2.612105  | 0.249307  |
| 20               | 6                | 0              | −0.050754               | −1.700558 | 0.075432  |
| 21               | 1                | 0              | 0.006646                | −2.781184 | 0.154001  |
| 22               | 7                | 0              | 1.109584                | −1.135310 | −0.041374 |
| 23               | 7                | 0              | 1.159400                | 0.218988  | −0.248078 |
| 24               | 1                | 0              | 0.308007                | 0.727573  | −0.476140 |
| 25               | 6                | 0              | 2.310587                | 0.965739  | −0.379198 |
| 26               | 8                | 0              | 2.194908                | 2.160681  | −0.715417 |
| 27               | 6                | 0              | 3.662513                | 0.397163  | −0.118883 |
| 28               | 6                | 0              | 4.740071                | 1.243949  | −0.400772 |
| 29               | 6                | 0              | 3.945356                | −0.873891 | 0.398363  |
| 30               | 6                | 0              | 5.531128                | 0.798890  | −0.165897 |
| 31               | 1                | 0              | 4.541197                | 2.232254  | −0.793224 |
| 32               | 6                | 0              | 5.279149                | −1.231498 | 0.606948  |
| 33               | 1                | 0              | 3.149742                | −1.564057 | 0.616463  |
| 34               | 7                | 0              | 6.315622                | −0.421203 | 0.333013  |
| 35               | 1                | 0              | 6.888690                | −2.203741 | 1.007147  |
| 36               | 1                | 0              | 6.037220                | 1.430263  | −0.377125 |
